# Supplementary material for: Effects of Aging on Hair Color, Melanosomes, and Melanin Composition in Japanese Males and Their Sex Differences
Source: MDPI journal article supplement (doi:10.3390/ijms232214459), 2022-11-21
Supplement: s1 [file s1]

# Supporting Information

## Effects of Aging on Hair Color, Melanosome, and Melanin Composition in Japanese Males and Their Sex Differences

Takashi Itou <sup>1</sup>, Shosuke Ito <sup>2</sup> and Kazumasa Wakamatsu <sup>2</sup>

<sup>1</sup> Kao Corporation, R&D - Hair Care Products Research, 2-1-3, Bunka,  
Sumida-ku, Tokyo 131-8501, Japan

<sup>2</sup> Institute for Melanin Chemistry, Fujita Health University, 1-98,  
Dengakugakubo, Kutsukake-cho, Toyoake, 470-1192, Japan

**Table S1.** The hair samples and the determined values of hair color and major and minor axis of the isolated melanosomes.

| Sample name | Age (year) | Hair tress         |     |     | l <sub>n</sub> | Melanosome     |            |
|-------------|------------|--------------------|-----|-----|----------------|----------------|------------|
|             |            | CIELAB coordinates |     |     |                | Mean ± SD (μm) |            |
|             |            | L*                 | a*  | b*  |                | Major axis     | Minor axis |
| DM-1        | 4          | 15.9               | 4.0 | 5.5 | 235            | 0.88±0.14      | 0.32±0.05  |
| DM-21       | 4          | 15.7               | 2.8 | 4.0 | 257            | 0.89±0.15      | 0.34±0.06  |
| DM-22       | 5          | 17.5               | 2.9 | 3.9 | 253            | 0.91±0.17      | 0.33±0.06  |
| HD05-62     | 6          | 15.0               | 3.0 | 3.6 | 315            | 0.92±0.20      | 0.37±0.08  |
| DM-2        | 11         | 14.7               | 1.4 | 2.4 | 272            | 0.88±0.16      | 0.35±0.07  |
| HS019       | 12         | 16.5               | 2.8 | 3.6 | 419            | 0.91±0.17      | 0.39±0.09  |
| DM-23       | 12         | 18.0               | 2.3 | 3.1 | 219            | 0.88±0.18      | 0.34±0.07  |
| DM-3        | 16         | 15.4               | 1.5 | 2.1 | 213            | 0.82±0.18      | 0.39±0.10  |
| DM-24       | 19         | 13.3               | 1.5 | 2.5 | 233            | 0.83±0.16      | 0.33±0.06  |
| DM-4        | 20         | 15.8               | 1.6 | 2.2 | 249            | 0.75±0.14      | 0.33±0.07  |
| DM-25       | 21         | 14.9               | 2.4 | 3.1 | 229            | 0.92±0.18      | 0.36±0.08  |
| HD106       | 28         | 17.0               | 2.5 | 3.4 | 268            | 0.88±0.18      | 0.37±0.08  |
| HD178       | 28         | 14.7               | 1.8 | 2.4 | 220            | 0.96±0.18      | 0.39±0.08  |
| DI          | 28         | 14.1               | 2.2 | 2.8 | 242            | 0.97±0.19      | 0.36±0.07  |
| GK          | 28         | 13.9               | 2.1 | 2.8 | 307            | 0.97±0.22      | 0.41±0.09  |
| SW          | 30         | 16.7               | 3.1 | 4.1 | 234            | 0.89±0.18      | 0.35±0.07  |
| DM-26       | 30         | 16.1               | 0.8 | 0.9 | 257            | 0.93±0.16      | 0.40±0.08  |
| BB-1        | 31         | 16.0               | 2.3 | 2.8 | 325            | 0.91±0.16      | 0.35±0.07  |
| DM-6        | 33         | 15.6               | 3.3 | 4.2 | 239            | 0.87±0.16      | 0.39±0.09  |
| DM-7        | 33         | 16.8               | 2.0 | 2.5 | 234            | 0.81±0.16      | 0.35±0.08  |
| DM-8        | 34         | 16.2               | 2.7 | 3.5 | 293            | 0.89±0.15      | 0.35±0.07  |
| DM-27       | 34         | 14.3               | 1.5 | 2.1 | 312            | 0.94±0.21      | 0.36±0.07  |
| HD21        | 36         | 16.4               | 3.2 | 4.2 | 314            | 0.80±0.17      | 0.33±0.07  |
| DM-28       | 36         | 14.6               | 2.0 | 2.7 | 208            | 0.90±0.17      | 0.39±0.09  |
| SK001       | 39         | 15.7               | 2.3 | 2.8 | 203            | 0.88±0.16      | 0.36±0.08  |
| BB-2        | 39         | 12.3               | 1.9 | 2.6 | 430            | 0.90±0.18      | 0.38±0.09  |
| DM-29       | 41         | 15.3               | 1.8 | 2.5 | 229            | 0.89±0.16      | 0.38±0.08  |
| MT-1        | 42         | -                  | -   | -   | 265            | 0.85±0.15      | 0.34±0.07  |
| HD149       | 43         | 15.4               | 1.4 | 1.8 | 220            | 0.86±0.16      | 0.37±0.09  |
| DM-30       | 44         | 15.5               | 1.2 | 1.6 | 256            | 0.94±0.17      | 0.37±0.07  |
| DM-10       | 50         | 13.8               | 0.8 | 1.4 | 233            | 0.93±0.15      | 0.39±0.09  |
| DM-31       | 50         | 14.8               | 2.5 | 3.5 | 202            | 0.99±0.20      | 0.43±0.12  |
| DM-32       | 50         | 15.9               | 1.5 | 1.8 | 286            | 0.94±0.18      | 0.43±0.10  |
| MT-2        | 50         | 13.7               | 1.9 | 3.1 | 307            | 0.97±0.22      | 0.41±0.09  |
| DM-33       | 51         | 14.6               | 1.4 | 2.3 | 210            | 0.94±0.20      | 0.42±0.10  |
| DM-11       | 52         | 15.5               | 1.1 | 1.8 | 243            | 0.82±0.14      | 0.38±0.08  |
| DM-13       | 52         | 15.4               | 1.5 | 1.9 | 276            | 0.89±0.16      | 0.42±0.09  |
| DM-14       | 53         | 15.7               | 2.1 | 3.0 | 213            | 0.93±0.18      | 0.41±0.09  |
| MT-3        | 55         | 13.1               | 1.3 | 2.4 | 208            | 0.89±0.18      | 0.34±0.06  |
| DM-36       | 58         | 14.1               | 1.6 | 2.2 | 208            | 0.94±0.17      | 0.37±0.09  |
| TI          | 60         | -                  | -   | -   | 269            | 0.98±0.17      | 0.40±0.09  |
| DM-17       | 60         | 14.1               | 1.1 | 1.7 | 203            | 0.89±0.17      | 0.40±0.09  |
| DM-18       | 68         | 14.6               | 0.5 | 0.9 | 241            | 0.93±0.19      | 0.42±0.11  |
| HD20        | 72         | 13.4               | 1.7 | 2.4 | 271            | 1.01±0.18      | 0.45±0.11  |

<sup>1</sup> n, the number of the isolated melanosomes used in the size measurements.

# Table S2. Levels of various melanin markers in the hair samples.

| Sample name | Age (year) | Solene-350 Solubilization |                 | H <sub>2</sub> O <sub>2</sub> oxidation (ng/mg) |            |            |             | H <sub>2</sub> O <sub>2</sub> oxidation after HCl hydrolysis (ng/mg) |            |            |             | 4-AHP (ng/mg) | TM (µg/mg) | Pheo-melanin (mol%) | DHI (mol%) |
|-------------|------------|---------------------------|-----------------|-------------------------------------------------|------------|------------|-------------|----------------------------------------------------------------------|------------|------------|-------------|---------------|------------|---------------------|------------|
|             |            | A500 (mg <sup>-1</sup> )  | A650/A500 ratio | PTCA level                                      | PDCA level | TTCA level | PTeCA level | PTCA level                                                           | PDCA level | TDCA level | PTeCA level |               |            |                     |            |
| DM-1        | 4          | 0.211                     | 0.294           | 222                                             | 24.5       | 40.8       | 75.8        | 113                                                                  | 16.5       | 44.5       | 78.8        | 2.7           | 21.3       | 13.0                | 70.6       |
| DM-21       | 4          | 0.156                     | 0.308           | 196                                             | 22.9       | 40.4       | 51.9        | 74.9                                                                 | 12.0       | 39.3       | 51.0        | 3.1           | 15.8       | 15.7                | 72.3       |
| DM-22       | 5          | 0.141                     | 0.326           | 147                                             | 18.8       | 36.3       | 42.6        | 63.8                                                                 | 10.1       | 36.4       | 45.4        | 3.6           | 14.2       | 17.3                | 75.0       |
| HD05-62     | 6          | 0.177                     | 0.294           | 200                                             | 16.4       | 47.6       | 67.9        | 92.8                                                                 | 11.2       | 34.5       | 75.7        | 1.6           | 17.9       | 14.8                | 63.2       |
| DM-2        | 11         | 0.189                     | 0.317           | 227                                             | 24.6       | 39.4       | 57.8        | 103                                                                  | 17.9       | 41.0       | 70.1        | 2.7           | 19.1       | 11.0                | 70.1       |
| HS019       | 12         | 0.159                     | 0.302           | 202                                             | 16.4       | 47.3       | 64.3        | 94.8                                                                 | 11.2       | 38.1       | 87.8        | 3.0           | 16.1       | 16.4                | 62.9       |
| DM-23       | 12         | 0.169                     | 0.308           | 168                                             | 15.6       | 32.9       | 32.7        | 77.0                                                                 | 12.5       | 35.9       | 50.9        | 2.4           | 17.1       | 13.8                | 66.0       |
| DM-3        | 16         | 0.214                     | 0.299           | 246                                             | 29.6       | 48.8       | 90.6        | 115                                                                  | 17.0       | 49.1       | 89.4        | 3.6           | 21.6       | 13.9                | 73.2       |
| DM-24       | 19         | 0.189                     | 0.307           | 224                                             | 25.0       | 52.1       | 57.2        | 93.8                                                                 | 15.6       | 48.4       | 65.0        | 5.1           | 19.1       | 14.9                | 70.9       |
| DM-4        | 20         | 0.178                     | 0.292           | 222                                             | 23.2       | 54.4       | 58.9        | 85.8                                                                 | 19.7       | 40.0       | 55.4        | 20.9          | 18.0       | 9.8                 | 69.1       |
| DM-25       | 21         | 0.155                     | 0.284           | 208                                             | 19.4       | 34.6       | 60.2        | 86.8                                                                 | 13.6       | 33.1       | 56.4        | 3.3           | 15.7       | 11.7                | 66.1       |
| HD106       | 28         | 0.192                     | 0.302           | 198                                             | 18.4       | 48.7       | 67.2        | 82.7                                                                 | 10.7       | 39.8       | 72.2        | 3.1           | 19.4       | 17.9                | 66.0       |
| HD178       | 28         | 0.166                     | 0.295           | 194                                             | 18.4       | 52.0       | 67.9        | 85.4                                                                 | 10.2       | 39.6       | 69.3        | 2.6           | 16.8       | 18.7                | 66.5       |
| DI          | 28         | 0.188                     | 0.287           | 207                                             | 18.4       | 56.2       | 82.4        | 97.3                                                                 | 11.2       | 37.5       | 82.9        | 4.1           | 19.0       | 16.1                | 65.0       |
| GK          | 28         | 0.196                     | 0.281           | 235                                             | 33.8       | 48.8       | 83.4        | 111                                                                  | 16.1       | 41.4       | 80.3        | 3.5           | 19.8       | 12.4                | 75.7       |
| SW          | 30         | 0.163                     | 0.307           | 191                                             | 16.4       | 40.4       | 53.3        | 84.0                                                                 | 9.2        | 35.5       | 65.0        | 2.3           | 16.5       | 18.6                | 64.2       |
| DM-26       | 30         | 0.264                     | 0.303           | 306                                             | 40.0       | 55.6       | 91.0        | 124                                                                  | 21.3       | 54.8       | 84.1        | 4.1           | 26.7       | 12.4                | 75.1       |
| BB-1        | 31         | 0.236                     | 0.314           | 328                                             | 24.5       | 67.0       | 103         | 121                                                                  | 13.3       | 42.0       | 89.9        | 3.4           | 23.8       | 15.2                | 61.2       |
| DM-6        | 33         | 0.195                     | 0.303           | 220                                             | 24.2       | 41.5       | 81.1        | 96.1                                                                 | 14.2       | 39.6       | 72.0        | 2.9           | 19.7       | 13.4                | 70.5       |
| DM-7        | 33         | 0.160                     | 0.300           | 191                                             | 23.9       | 45.6       | 61.6        | 74.5                                                                 | 18.8       | 37.4       | 48.9        | 5.0           | 16.2       | 9.6                 | 74.5       |
| DM-8        | 34         | 0.190                     | 0.311           | 250                                             | 23.1       | 49.9       | 71.4        | 114                                                                  | 16.3       | 47.9       | 89.7        | 3.5           | 19.2       | 14.1                | 65.9       |
| DM-27       | 34         | 0.241                     | 0.282           | 238                                             | 31.6       | 55.9       | 74.1        | 98.0                                                                 | 19.7       | 50.3       | 71.0        | 3.3           | 24.3       | 12.3                | 75.2       |
| HD21        | 36         | 0.119                     | 0.319           | 140                                             | 12.3       | 64.7       | 37.7        | 61.3                                                                 | 8.7        | 27.4       | 48.4        | 3.0           | 12.0       | 15.1                | 64.7       |
| DM-28       | 36         | 0.193                     | 0.301           | 230                                             | 27.6       | 58.5       | 62.1        | 101                                                                  | 18.0       | 50.7       | 75.8        | 7.1           | 19.5       | 13.5                | 73.2       |
| SK001       | 39         | 0.212                     | 0.321           | 241                                             | 24.5       | 68.0       | 73.5        | 104                                                                  | 13.3       | 33.9       | 90.9        | 2.6           | 21.4       | 12.3                | 68.3       |
| BB-2        | 39         | 0.237                     | 0.304           | 326                                             | 24.5       | 73.2       | 104         | 137                                                                  | 16.4       | 50.5       | 108         | 2.8           | 23.9       | 14.8                | 61.4       |
| DM-29       | 41         | 0.219                     | 0.315           | 245                                             | 30.2       | 47.5       | 72.2        | 104                                                                  | 16.6       | 54.2       | 88.4        | 3.5           | 22.1       | 15.7                | 74.0       |
| MT-1        | 42         | 0.188                     | 0.293           | 231                                             | 16.4       | 58.8       | 85.3        | 100                                                                  | 11.3       | 38.2       | 72.2        | 4.5           | 19.0       | 16.3                | 60.3       |
| HD149       | 43         | 0.176                     | 0.318           | 214                                             | 20.4       | 70.4       | 73.5        | 91.5                                                                 | 11.2       | 43.2       | 78.8        | 3.9           | 17.8       | 18.5                | 66.7       |
| DM-30       | 44         | 0.222                     | 0.297           | 276                                             | 31.6       | 54.2       | 91.0        | 117                                                                  | 19.3       | 54.4       | 96.7        | 4.1           | 22.4       | 13.6                | 71.7       |
| DM-10       | 50         | 0.298                     | 0.326           | 293                                             | 33.7       | 55.6       | 75.8        | 117                                                                  | 21.9       | 56.6       | 92.5        | 4.2           | 30.1       | 12.4                | 71.8       |
| DM-31       | 50         | 0.208                     | 0.298           | 226                                             | 24.5       | 63.6       | 67.3        | 109                                                                  | 17.1       | 53.5       | 86.5        | 3.9           | 21.0       | 15.0                | 70.1       |
| DM-32       | 50         | 0.226                     | 0.310           | 209                                             | 27.2       | 42.0       | 67.3        | 89.7                                                                 | 18.1       | 41.3       | 65.2        | 2.7           | 22.8       | 11.0                | 75.1       |
| MT-2        | 50         | 0.196                     | 0.311           | 241                                             | 23.1       | 43.9       | 79.2        | 92.1                                                                 | 14.4       | 40.3       | 61.4        | 4.0           | 19.8       | 13.5                | 66.8       |
| DM-33       | 51         | 0.219                     | 0.311           | 225                                             | 27.7       | 49.9       | 59.3        | 91.7                                                                 | 18.2       | 46.9       | 67.2        | 4.4           | 22.1       | 12.4                | 74.0       |
| DM-11       | 52         | 0.229                     | 0.314           | 250                                             | 27.0       | 47.6       | 67.6        | 96.4                                                                 | 16.9       | 43.9       | 71.1        | 4.6           | 23.1       | 12.5                | 70.0       |
| DM-13       | 52         | 0.216                     | 0.301           | 232                                             | 29.6       | 54.2       | 79.4        | 98.1                                                                 | 15.0       | 46.5       | 72.0        | 4.3           | 21.8       | 14.9                | 75.0       |
| DM-14       | 53         | 0.178                     | 0.320           | 212                                             | 24.4       | 44.9       | 52.8        | 81.5                                                                 | 15.1       | 36.1       | 53.9        | 10.8          | 18.0       | 11.5                | 71.9       |
| MT-3        | 55         | 0.208                     | 0.322           | 244                                             | 28.9       | 44.2       | 65.4        | 91.9                                                                 | 15.5       | 41.4       | 63.6        | 3.8           | 21.0       | 12.8                | 72.7       |
| DM-36       | 58         | 0.258                     | 0.310           | 264                                             | 30.1       | 62.1       | 60.2        | 111                                                                  | 20.0       | 52.1       | 82.6        | 4.9           | 26.1       | 12.5                | 71.6       |
| TI          | 60         | 0.286                     | 0.311           | 340                                             | 36.8       | 87.5       | 97.2        | 141                                                                  | 19.4       | 67.8       | 117         | 3.2           | 28.9       | 16.8                | 70.1       |
| DM-17       | 60         | 0.259                     | 0.317           | 266                                             | 33.6       | 58.5       | 76.4        | 110                                                                  | 19.3       | 55.6       | 81.5        | 4.6           | 26.2       | 13.9                | 74.8       |
| DM-18       | 68         | 0.309                     | 0.324           | 327                                             | 41.6       | 55.4       | 81.7        | 128                                                                  | 24.1       | 58.6       | 93.4        | 4.8           | 31.2       | 11.7                | 75.0       |
| HD20        | 72         | 0.257                     | 0.311           | 280                                             | 24.5       | 75.1       | 110         | 130                                                                  | 17.9       | 60.1       | 110         | 3.8           | 26.0       | 16.1                | 64.6       |

PTCA: pyrrole-2,3,5-tricarboxylic acid, PDCA: pyrrole-2,3-dicarboxylic acid, PTeCA: pyrrole-2,3,4,5-tetracarboxylic acid, TTCA: thiazole-2,4,5-tricarboxylic acid, TDCA: thiazole-4,5-dicarboxylic acid, 4-AHP: 4-amino-3-hydroxyphenylalanine

**Table S3.** Results of the regression analyses between hair color parameters and various values for all (male+female) subjects.

| Parameter                      | $L^*$  |                      | $a^*$  |                       | $b^*$  |                       |
|--------------------------------|--------|----------------------|--------|-----------------------|--------|-----------------------|
|                                | $R^2$  | $p$ -value           | $R^2$  | $p$ -value            | $R^2$  | $p$ -value            |
| PTCA level (ng/mg)             | 0.43   | $2.0 \times 10^{-9}$ | 0.48   | $8.4 \times 10^{-11}$ | 0.48   | $7.2 \times 10^{-11}$ |
| PDCA level (ng/mg)             | 0.36   | $9.7 \times 10^{-8}$ | 0.61   | $4.8 \times 10^{-15}$ | 0.59   | $4.0 \times 10^{-14}$ |
| PTeCA level (ng/mg)            | 0.25   | $1.8 \times 10^{-5}$ | 0.14   | 0.0015                | 0.18   | 0.00037               |
| TTCA level (ng/mg)             | 0.19   | 0.00027              | 0.18   | 0.00031               | 0.21   | $7.9 \times 10^{-5}$  |
| 4-AHP level (ng/mg)            | 0.0012 | 0.78                 | 0.0045 | 0.59                  | 0.0091 | 0.44                  |
| TM ( $\mu\text{g}/\text{mg}$ ) | 0.40   | $8.3 \times 10^{-9}$ | 0.52   | $4.6 \times 10^{-12}$ | 0.50   | $2.0 \times 10^{-11}$ |
| DHI (mol%)                     | 0.037  | 0.12                 | 0.22   | $5.9 \times 10^{-5}$  | 0.20   | 0.00018               |
| Pheomelanin (mol%)             | 0.13   | 0.0031               | 0.19   | 0.00020               | 0.17   | 0.00046               |

**Table S4.** Results of the multiple regression analyses among hair color parameters, TM, DHI mol%, and pheomelanin mol% for all (male+female) subjects.

| Hair color<br>parameter | Result |                       | Intercept   |                       | TM          |                       | DHI mol%    |            | Pheomelanin mol% |            |
|-------------------------|--------|-----------------------|-------------|-----------------------|-------------|-----------------------|-------------|------------|------------------|------------|
|                         | $R^2$  | $p$ -value            | coefficient | $p$ -value            | coefficient | $p$ -value            | coefficient | $p$ -value | coefficient      | $p$ -value |
| $L^*$                   | 0.44   | $8.8 \times 10^{-9}$  | 18.55       | $3.9 \times 10^{-23}$ | -0.2215     | $1.1 \times 10^{-7}$  | -           | -          | 0.1043           | 0.042      |
| $a^*$                   | 0.62   | $3.5 \times 10^{-13}$ | 8.03        | $4.1 \times 10^{-5}$  | -0.1622     | $8.9 \times 10^{-10}$ | -0.0522     | 0.032      | 0.0756           | 0.017      |
| $b^*$                   | 0.58   | $6.6 \times 10^{-12}$ | 10.16       | 0.00014               | -0.2115     | $4.1 \times 10^{-9}$  | -0.0610     | 0.067      | 0.0926           | 0.033      |

## Figure S1

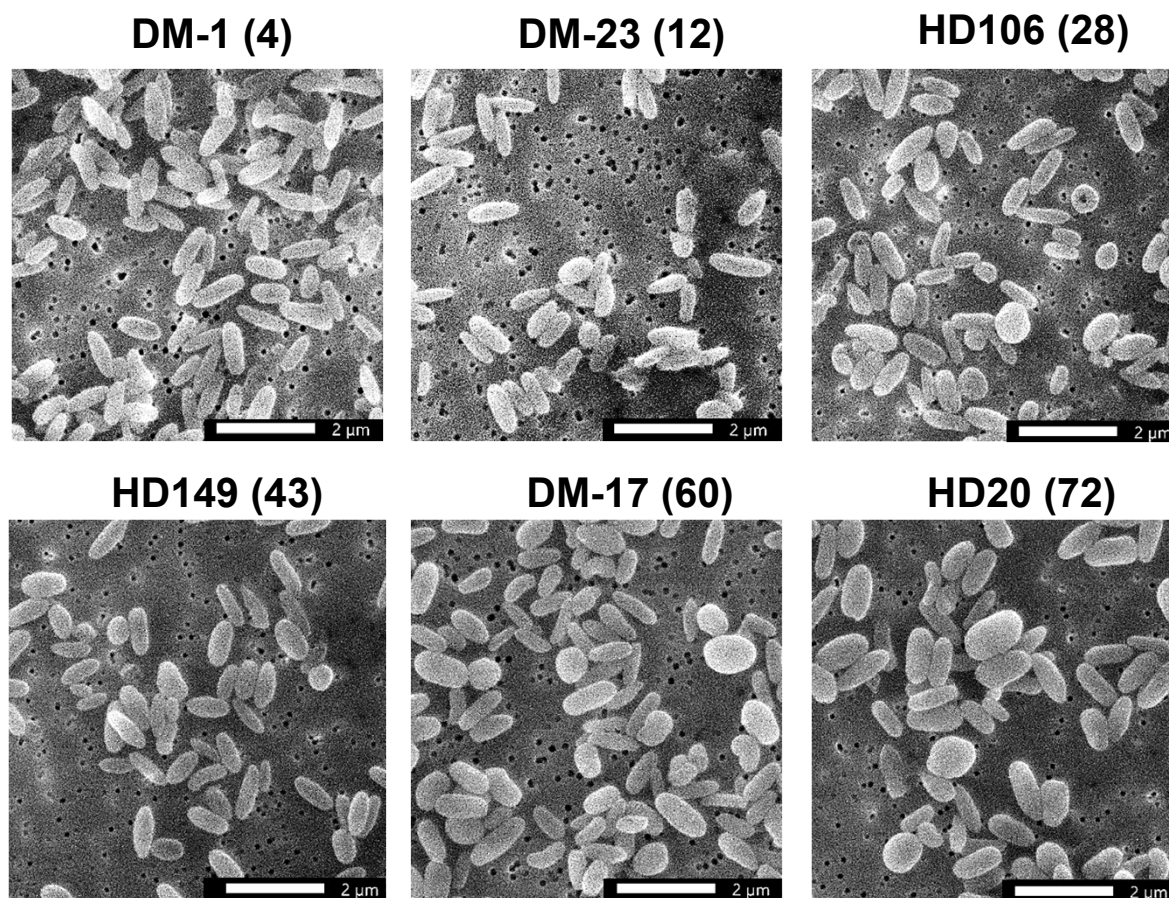

Figure S1 shows representative SEM images of melanosomes isolated from non-chemical-treated Japanese male pigmented hairs. Sample names are shown above the images. Numbers in parentheses are the age of the subjects. The scale bar in each figure means 2  $\mu\text{m}$  and the magnification of all pictures are the same. Isolated melanosomes are ellipsoidal forms on the whole. Small dots with the dimension of 0.1  $\mu\text{m}$  are pores of the membrane.

**Figure S2**

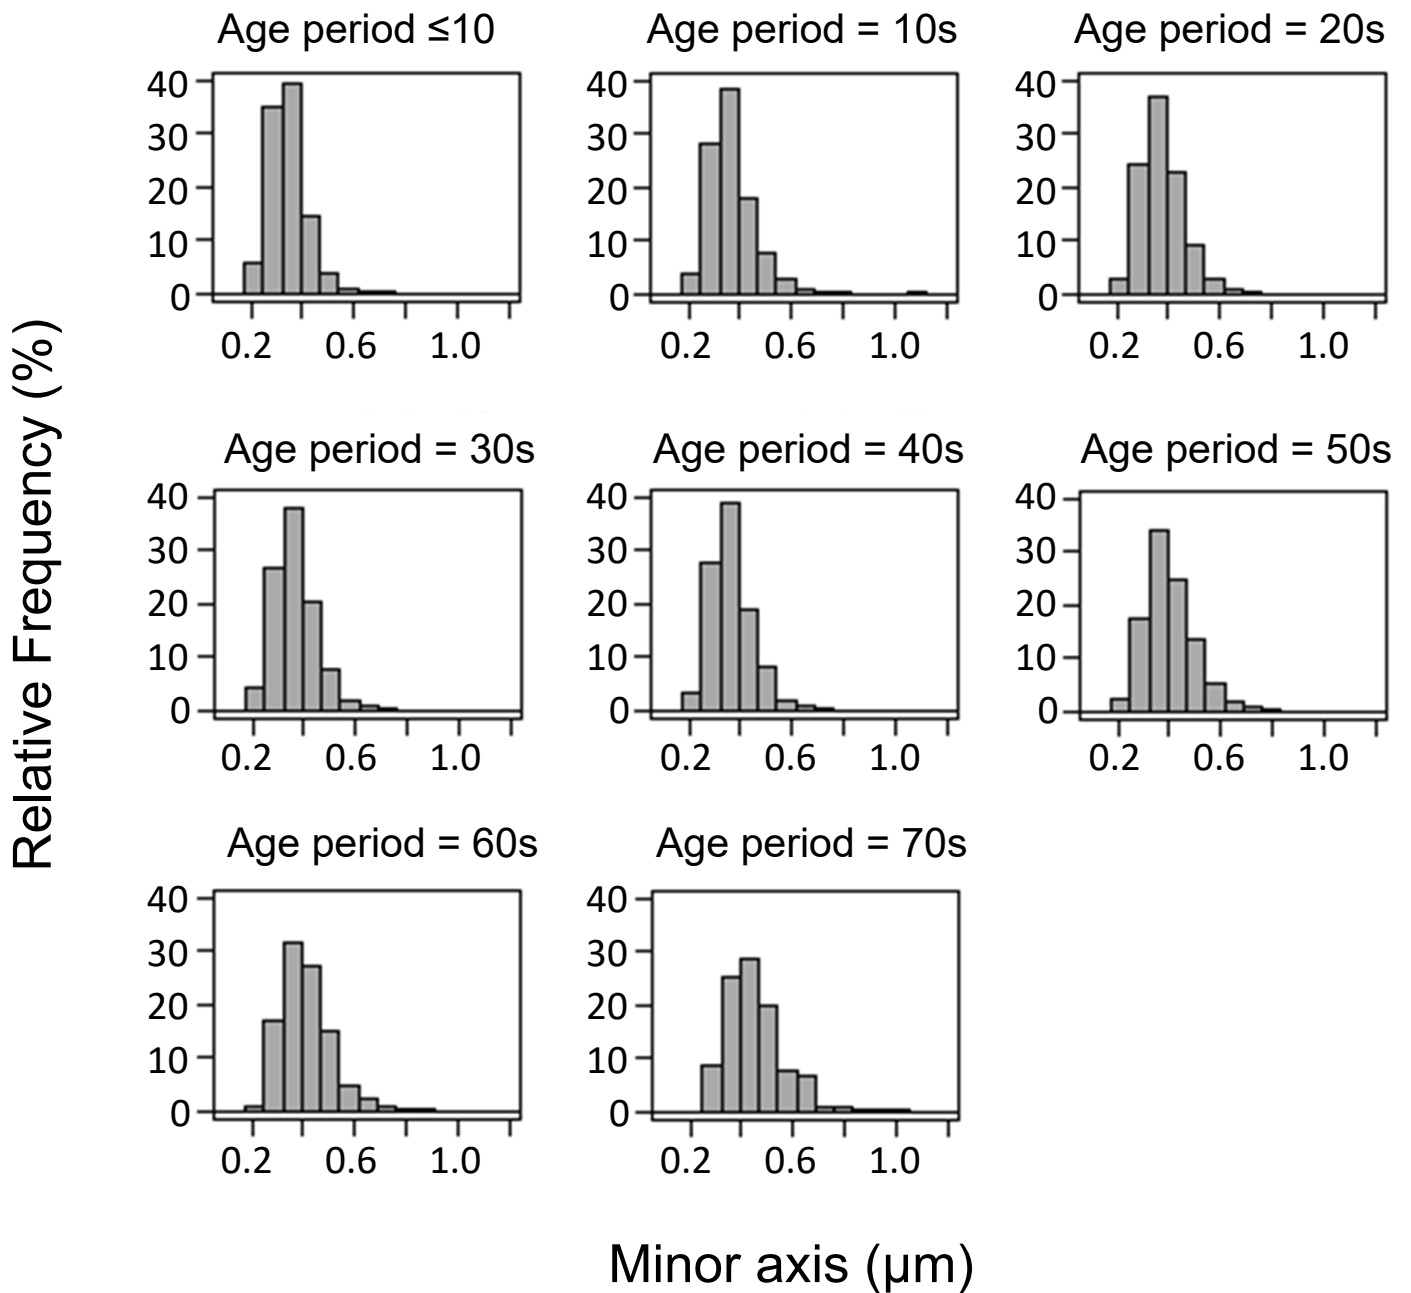

Relative frequency distributions of the melanosomal minor axis for each age period. The age periods are shown above the figures.

**Figure S3**

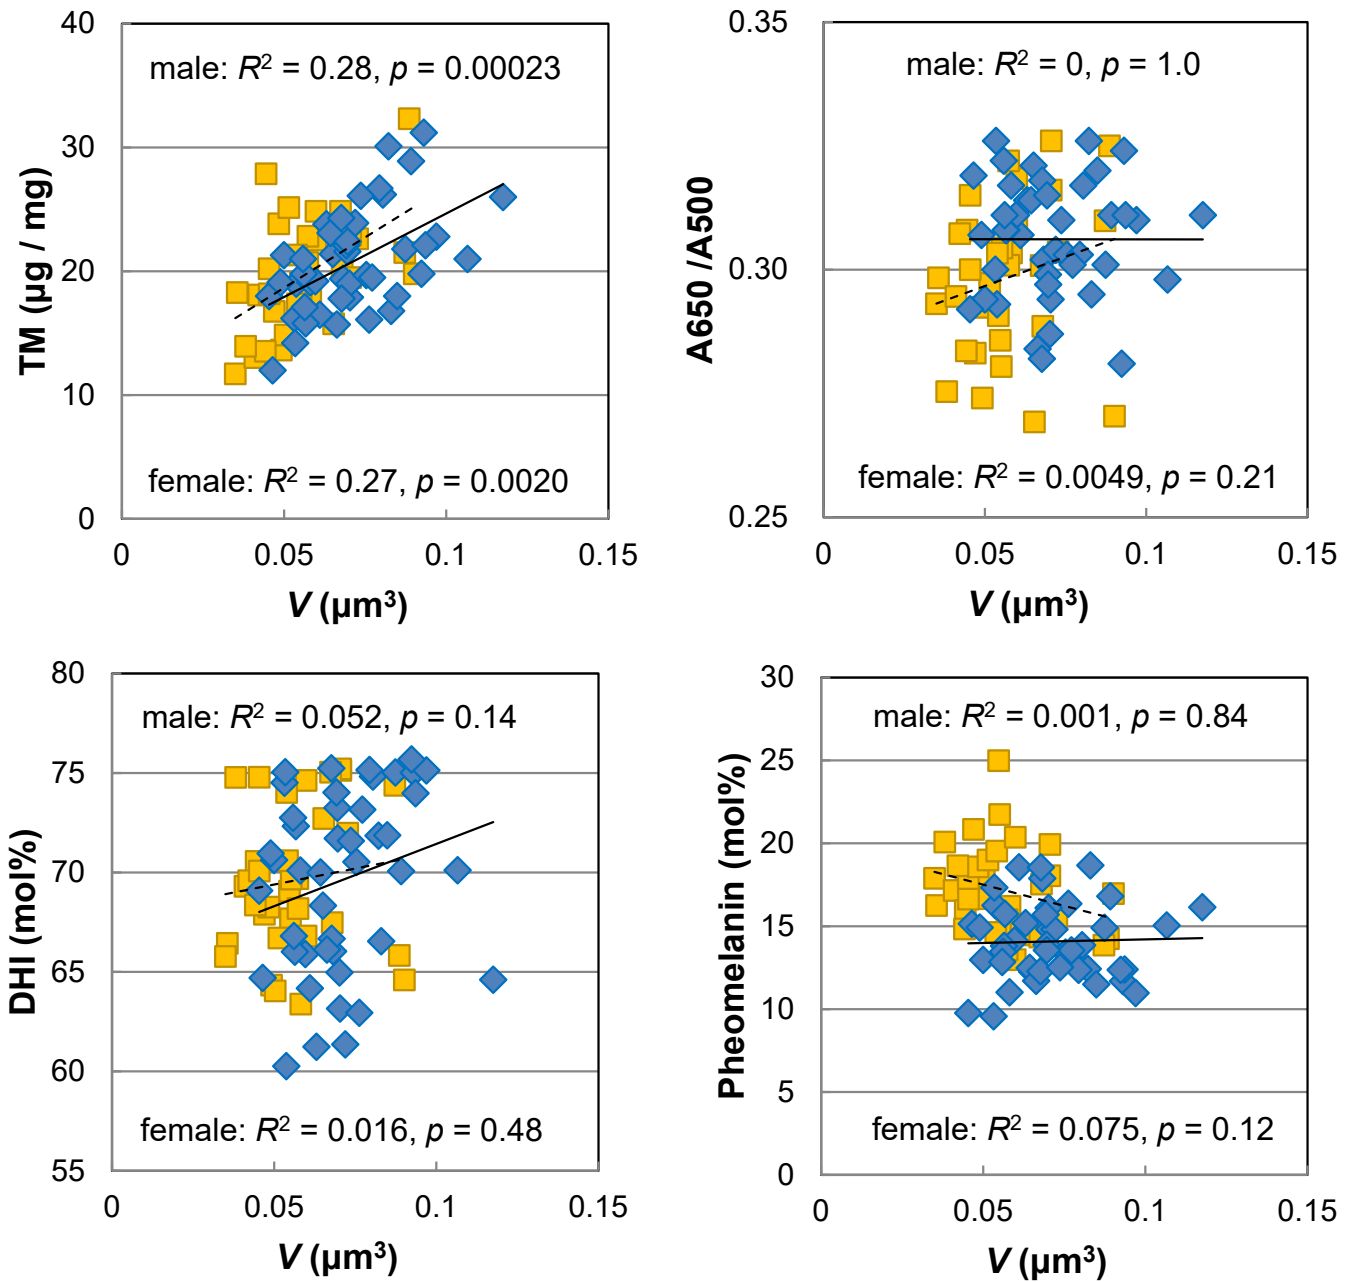

Various values measured by hair melanin analyses vs. mean volume of melanosomes isolated from Japanese male (diamonds) and female (squares) hair samples with an assumption of ellipsoid. (a) Total melanin amount. (b) Absorbance ratio  $A_{650}/A_{500}$ . (c) DHI mol%. (d) Pheomelanin mol%. The coefficient of determination and  $p$ -value are shown in each figure.



**Figure S4**

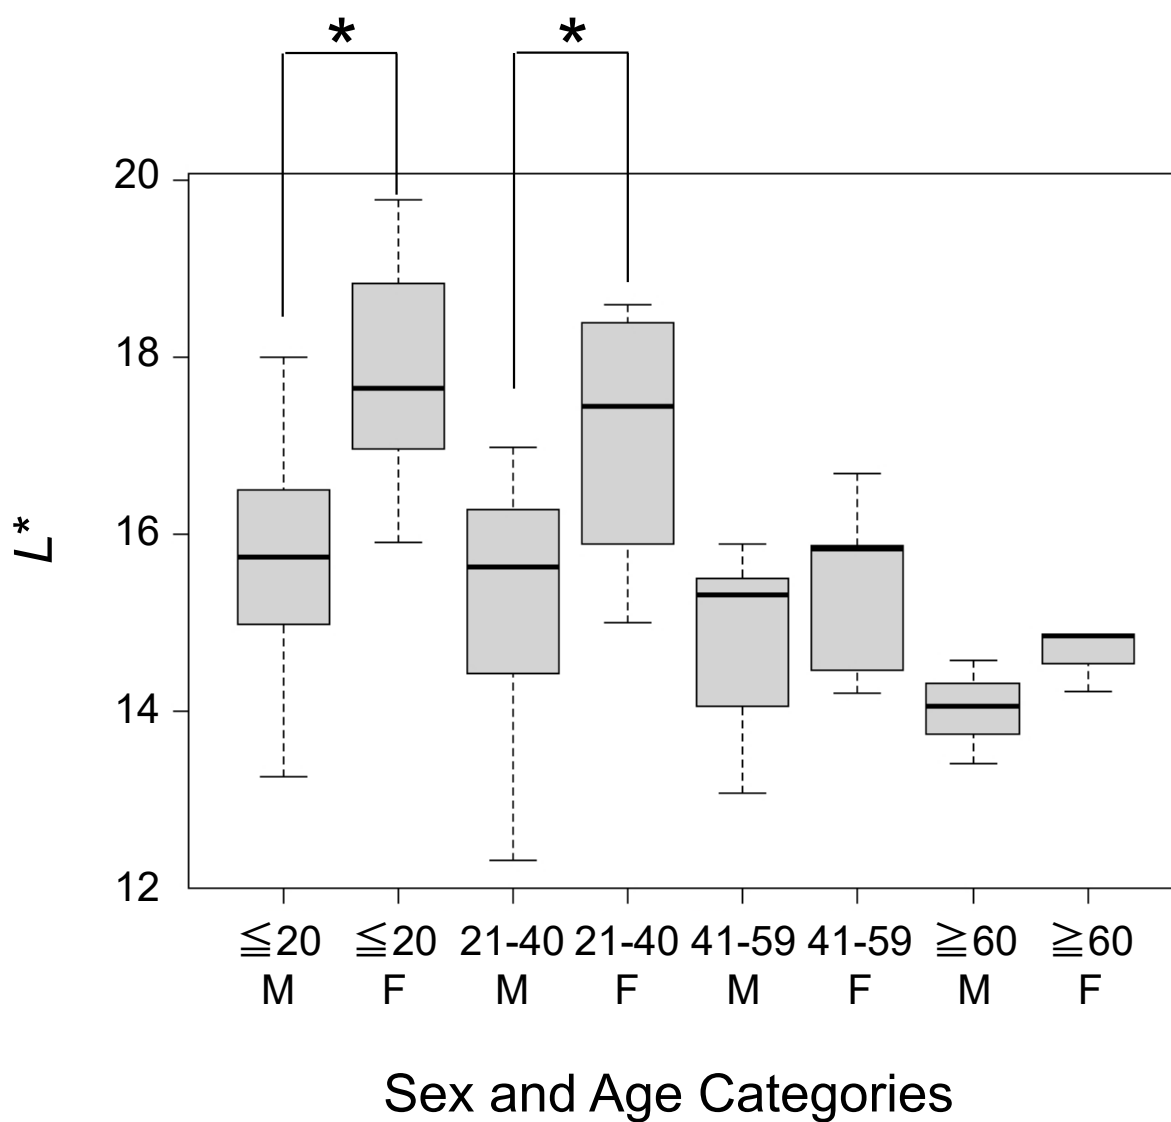

A boxplot of  $L^*$  in groups that differ by age period of Japanese male (M) and female (F) pigmented hairs.

\* indicates a significant difference at the 5% level.

**Figure S5**

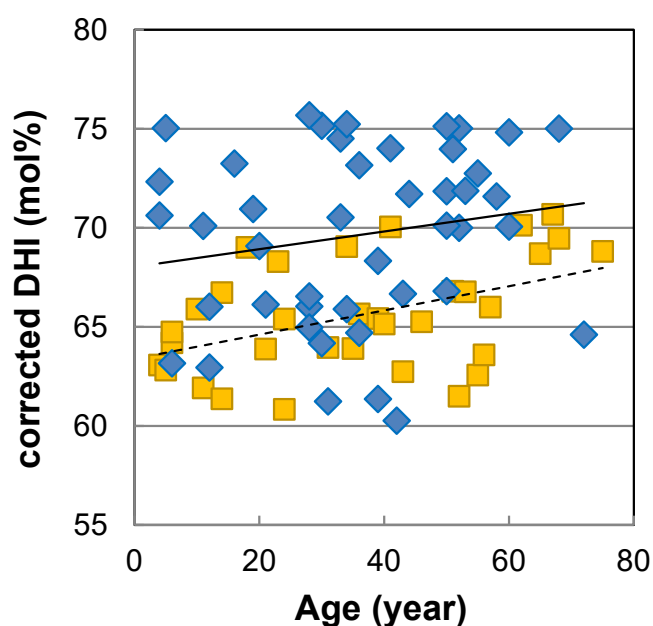

The age dependences of the DHI mol% in Japanese male (diamonds) and female (squares) pigmented hairs. The DHI mol% values for male hairs were measured in this study and those for female hairs were corrected assuming that they would be obtained in the improved HPLC condition (see text).
